# Supplementary material
Source: Springer Nature journal article supplement (https://www.springermedizin.de/resource/supplementary/12911_2012_510_MOESM3_ESM.pdf/9526050)
Supplement: MOESM3 [file 9526050]

2011-May-17



 Other Medications

Cancel

On visit entry: 2011-May-17

On visit entry

Reset »

|                  |                                                          |   | Medication name  | Dose                 | Copy All » |
|------------------|----------------------------------------------------------|---|------------------|----------------------|------------|
| rosuvastatin     | 10-mg od                                                 | > | rosuvastatin     | 10-mg od             | copy >     |
| chlorthalidone   | 25-mg od                                                 | > | chlorthalidone   | 25-mg od             | copy >     |
| Lamotrigine      | 100-mg, 1.25 tabs bid                                    | > | Lamotrigine      | 100-mg, 1.25 tabs bi | copy >     |
| Carbamazepine cr | 600-mg at breakfast, 800-mg at 4:00 pm and 400-mg at bed | > | Carbamazepine cr | 600-mg at breakfast, | copy >     |
| trifluoperazine  | 5-mg QID                                                 | > | trifluoperazine  | 5-mg QID             | copy >     |
| clomipramine     | 25-mg HS                                                 | > | clomipramine     | 25-mg HS             | copy >     |
| Ramipril         | 10-mg od                                                 | > | Ramipril         | 10-mg od             | copy >     |
| Glucagon         | PRN                                                      | > | Glucagon         | PRN                  | copy >     |
|                  |                                                          | > |                  |                      | copy >     |
|                  |                                                          | > |                  |                      | copy >     |
|                  |                                                          | > |                  |                      | copy >     |
|                  |                                                          | > |                  |                      | copy >     |
|                  |                                                          | > |                  |                      | copy >     |
|                  |                                                          | > |                  |                      | copy >     |
|                  |                                                          | > |                  |                      | copy >     |

On visit exit: 2011-May-17

On visit exit

Clear »

|                  |                                                          |   | Medication name | Dose | « Copy All |
|------------------|----------------------------------------------------------|---|-----------------|------|------------|
| rosuvastatin     | 10-mg od                                                 | > |                 |      |            |
| chlorthalidone   | 25-mg od                                                 | > |                 |      |            |
| Lamotrigine      | 100-mg, 1.25 tabs bid                                    | > |                 |      |            |
| Carbamazepine cr | 600-mg at breakfast, 800-mg at 4:00 pm and 400-mg at bed | > |                 |      |            |
| trifluoperazine  | 5-mg QID                                                 | > |                 |      |            |
| clomipramine     | 25-mg HS                                                 | > |                 |      |            |
| Ramipril         | 10-mg od                                                 | > |                 |      |            |
| Glucagon         | PRN                                                      | > |                 |      |            |
|                  |                                                          | > |                 |      |            |

2011-May-17



 Other Medications

Cancel

On visit entry: 2011-May-17

On visit entry

Reset »

|                  |                                                          |   | Medication name  | Dose                 | Copy All » |
|------------------|----------------------------------------------------------|---|------------------|----------------------|------------|
| rosuvastatin     | 10-mg od                                                 | > | rosuvastatin     | 10-mg od             | copy >     |
| chlorthalidone   | 25-mg od                                                 | > | chlorthalidone   | 25-mg od             | copy >     |
| Lamotrigine      | 100-mg, 1.25 tabs bid                                    | > | Lamotrigine      | 100-mg, 1.25 tabs bi | copy >     |
| Carbamazepine cr | 600-mg at breakfast, 800-mg at 4:00 pm and 400-mg at bed | > | Carbamazepine cr | 600-mg at breakfast, | copy >     |
| trifluoperazine  | 5-mg QID                                                 | > | trifluoperazine  | 5-mg QID             | copy >     |
| clomipramine     | 25-mg HS                                                 | > | clomipramine     | 25-mg HS             | copy >     |
| Ramipril         | 10-mg od                                                 | > | Ramipril         | 10-mg od             | copy >     |
| Glucagon         | PRN                                                      | > | Glucagon         | PRN                  | copy >     |
|                  |                                                          | > |                  |                      | copy >     |
|                  |                                                          | > |                  |                      | copy >     |
|                  |                                                          | > |                  |                      | copy >     |
|                  |                                                          | > |                  |                      | copy >     |
|                  |                                                          | > |                  |                      | copy >     |
|                  |                                                          | > |                  |                      | copy >     |
|                  |                                                          | > |                  |                      | copy >     |

On visit exit: 2011-May-17

On visit exit

Clear »

|                  |                                                          |   | Medication name | Dose | « Copy All |
|------------------|----------------------------------------------------------|---|-----------------|------|------------|
| rosuvastatin     | 10-mg od                                                 | > |                 |      |            |
| chlorthalidone   | 25-mg od                                                 | > |                 |      |            |
| Lamotrigine      | 100-mg, 1.25 tabs bid                                    | > |                 |      |            |
| Carbamazepine cr | 600-mg at breakfast, 800-mg at 4:00 pm and 400-mg at bed | > |                 |      |            |
| trifluoperazine  | 5-mg QID                                                 | > |                 |      |            |
| clomipramine     | 25-mg HS                                                 | > |                 |      |            |
| Ramipril         | 10-mg od                                                 | > |                 |      |            |
| Glucagon         | PRN                                                      | > |                 |      |            |
|                  |                                                          | > |                 |      |            |
